# Supplementary material
Source: PubMed Central journal article supplement (PMC4104327)
Supplement: npp201458x2.pdf [file npp201458x2.pdf]

Table S1A - Descriptive statistics for pre-stimulus baseline alpha power (% change from baseline)

|         |            | Pre-Drink | Post-Drink |
|---------|------------|-----------|------------|
| Alcohol | Mean Power | 6.74      | 8.58       |
|         | SD         | 2.01      | 2.91       |
| Placebo | Mean Power | 7.81      | 6.6        |
|         | SD         | 4.75      | 2.21       |

Table S1B - Descriptive statistics for pre-stimulus baseline gamma power (% change from baseline)

|         |            | Pre-Drink | Post-Drink |
|---------|------------|-----------|------------|
| Alcohol | Mean Power | 0.97      | 1.01       |
|         | SD         | 0.11      | 0.18       |
| Placebo | Mean Power | 1.04      | 0.95       |
|         | SD         | 0.21      | 0.13       |

Table S1C - Descriptive statistics of alcohol intoxication effects

| Saccadic Eye Movement velocity   |      | Pre-Drink | Post-Drink |
|----------------------------------|------|-----------|------------|
| Alcohol                          | Mean | 544.05    | 498.64     |
|                                  | SD   | 44.49     | 30.3       |
| Placebo                          | Mean | 556.9     | 536.84     |
|                                  | SD   | 54.54     | 38.3       |
| <b>BAES - Sedative feelings</b>  |      |           |            |
| Alcohol                          | Mean |           | 2.6        |
|                                  | SD   |           | 1.06       |
| Placebo                          | Mean |           | 1.03       |
|                                  | SD   |           | 0.33       |
| <b>BAES - stimulant feelings</b> |      |           |            |
| Alcohol                          | Mean |           | 2.79       |
|                                  | SD   |           | 0.66       |
| Placebo                          | Mean | N/A       | 2.17       |
|                                  | SD   |           | 0.4        |
| <b>SHAS</b>                      |      |           |            |
| Alcohol                          | Mean |           | 3.38       |
|                                  | SD   |           | 1.31       |
| Placebo                          | Mean |           | 1.1        |
|                                  | SD   |           | 0.84       |

Table S2A Correlations of change in oscillatory responses after alcohol intoxication (\* =  $p < .05$ , \*\* =  $p < .01$ )

|                                            |                       | Change in visual gamma power (ALCOHOL) | Change in visual gamma frequency (ALCOHOL) | Change in motor gamma power (ALCOHOL) | Change in visual gamma power (PLACEBO) | Change in visual gamma frequency (PLACEBO) | Change in motor gamma power (PLACEBO) |
|--------------------------------------------|-----------------------|----------------------------------------|--------------------------------------------|---------------------------------------|----------------------------------------|--------------------------------------------|---------------------------------------|
| Change in visual gamma power (ALCOHOL)     | Pearson's correlation | 1                                      | .473                                       | .062                                  | .42                                    | -.025                                      | .16                                   |
|                                            | Significance (p)      |                                        | .12                                        | .864                                  | .174                                   | .938                                       | .659                                  |
|                                            | N                     | 12                                     | 12                                         | 10                                    | 12                                     | 12                                         | 10                                    |
| Change in visual gamma frequency (ALCOHOL) | Pearson's correlation | .473                                   | 1                                          | .58                                   | .15                                    | -.124                                      | -.175                                 |
|                                            | Significance (p)      | .12                                    |                                            | .079                                  | .642                                   | .701                                       | .628                                  |
|                                            | N                     | 12                                     | 12                                         | 10                                    | 12                                     | 12                                         | 10                                    |
| Change in motor gamma power (ALCOHOL)      | Pearson's correlation | .062                                   | .58                                        | 1                                     | -.191                                  | -.297                                      | .197                                  |
|                                            | Significance (p)      | .864                                   | .079                                       |                                       | .597                                   | .405                                       | .5                                    |
|                                            | N                     | 10                                     | 10                                         | 14                                    | 10                                     | 10                                         | 14                                    |
| Change in visual gamma power (PLACEBO)     | Pearson's correlation | .42                                    | .15                                        | -.191                                 | 1                                      | -.234                                      | -.607                                 |
|                                            | Significance (p)      | .174                                   | .642                                       | .597                                  |                                        | .464                                       | .063                                  |
|                                            | N                     | 12                                     | 12                                         | 10                                    | 12                                     | 12                                         | 10                                    |
| Change in visual gamma frequency (PLACEBO) | Pearson's correlation | -.025                                  | -.124                                      | -.297                                 | -.234                                  | 1                                          | -.261                                 |
|                                            | Significance (p)      | .938                                   | .701                                       | .405                                  | .464                                   |                                            | .467                                  |
|                                            | N                     | 12                                     | 12                                         | 10                                    | 12                                     | 12                                         | 10                                    |
| Change in motor gamma power (PLACEBO)      | Pearson's correlation | .16                                    | -.175                                      | .197                                  | -.607                                  | -.261                                      | 1                                     |
|                                            | Significance (p)      | .659                                   | .628                                       | .5                                    | .063                                   | .467                                       |                                       |
|                                            | N                     | 10                                     | 10                                         | 14                                    | 10                                     | 10                                         | 14                                    |

Table S2B Correlations of change in oscillatory responses, breath alcohol and subjective measures of intoxication (\* =  $p < .05$ , \*\* =  $p < .01$ ).

|                                                       |                       | Change in visual gamma power (ALCOHOL) | Change in visual gamma frequency (ALCOHOL) | Change in motor gamma power (ALCOHOL) | Change in visual button-press reaction time (ALCOHOL) | Change in amplitude of motor response (ALCOHOL) | Change in latency of motor response (ALCOHOL) | Change in velocity of SEM (ALCOHOL) | Breath Alcohol Content | Change in Subjective High Assessment Scale | Change in Sedative score on BAES | Change in Stimulant score on BAES |
|-------------------------------------------------------|-----------------------|----------------------------------------|--------------------------------------------|---------------------------------------|-------------------------------------------------------|-------------------------------------------------|-----------------------------------------------|-------------------------------------|------------------------|--------------------------------------------|----------------------------------|-----------------------------------|
| Change in visual gamma power (ALCOHOL)                | Pearson's correlation | 1                                      | .473                                       | .062                                  | -.058                                                 | .07                                             | -.245                                         | .109                                | -.42                   | .144                                       | -.47                             | .315                              |
|                                                       | Significance (p)      |                                        | .12                                        | .864                                  | .858                                                  | .838                                            | .467                                          | .737                                | .174                   | .711                                       | .123                             | .409                              |
|                                                       | N                     | 12                                     | 12                                         | 10                                    | 12                                                    | 11                                              | 11                                            | 12                                  | 12                     | 9                                          | 12                               | 9                                 |
| Change in visual gamma frequency (ALCOHOL)            | Pearson's correlation | .473                                   | 1                                          | .58                                   | -.29                                                  | -.033                                           | -.297                                         | -.022                               | <b>-.605</b>           | -.026                                      | -.473                            | -.123                             |
|                                                       | Significance (p)      |                                        |                                            | .079                                  | .36                                                   | .923                                            | .375                                          | .945                                | <b>.037*</b>           | .947                                       | .12                              | .752                              |
|                                                       | N                     | 12                                     | 12                                         | 10                                    | 12                                                    | 11                                              | 11                                            | 12                                  | <b>12</b>              | 9                                          | 12                               | 9                                 |
| Change in motor gamma power (ALCOHOL)                 | Pearson's correlation | .062                                   | .58                                        | 1                                     | .168                                                  | .033                                            | -.119                                         | -.092                               | -.335                  | -.532                                      | -.417                            | -.12                              |
|                                                       | Significance (p)      |                                        | .079                                       |                                       | .565                                                  | .915                                            | .698                                          | .765                                | .242                   | .092                                       | .138                             | .724                              |
|                                                       | N                     | 10                                     | 10                                         | 14                                    | 14                                                    | 13                                              | 13                                            | 13                                  | 14                     | 11                                         | 14                               | 11                                |
| Change in visual button-press reaction time (ALCOHOL) | Pearson's correlation | -.058                                  | -.29                                       | .168                                  | 1                                                     | .361                                            | .212                                          | .192                                | -.131                  | -.456                                      | -.356                            | -.437                             |
|                                                       | Significance (p)      |                                        | .36                                        | .565                                  |                                                       | .186                                            | .449                                          | .493                                | .629                   | .117                                       | .175                             | .135                              |
|                                                       | N                     | 12                                     | 12                                         | 14                                    | 16                                                    | 15                                              | 15                                            | 15                                  | 16                     | 13                                         | 16                               | 13                                |
| Change in amplitude of motor response (ALCOHOL)       | Pearson's correlation | .07                                    | -.033                                      | .033                                  | .361                                                  | 1                                               | <b>.859</b>                                   | <b>-.547</b>                        | -.265                  | -.276                                      | <b>-.583</b>                     | .134                              |
|                                                       | Significance (p)      |                                        | .923                                       | .915                                  | .186                                                  |                                                 | <b>&lt;.000**</b>                             | <b>.043*</b>                        | .34                    | .385                                       | <b>.022*</b>                     | .678                              |
|                                                       | N                     | 11                                     | 11                                         | 13                                    | 15                                                    | 15                                              | <b>15</b>                                     | <b>14</b>                           | 15                     | 12                                         | <b>15</b>                        | 12                                |

Table S2B continued (\* =  $p < .05$ , \*\* =  $p < .01$ )

|                                                           |                          | Change in<br>visual gamma<br>power<br>(ALCOHOL) | Change in<br>visual gamma<br>frequency<br>(ALCOHOL) | Change in<br>motor gamma<br>power<br>(ALCOHOL) | Change in<br>visual button-<br>press reaction<br>time<br>(ALCOHOL) | Change in<br>amplitude of<br>motor<br>response<br>(ALCOHOL) | Change in<br>latency of<br>motor<br>response<br>(ALCOHOL) | Change in<br>velocity of<br>SEM<br>(ALCOHOL) | Breath<br>Alcohol<br>Content | Change in<br>Subjective<br>High<br>Assessment<br>Scale | Change in<br>Sedative<br>score on<br>BAES | Change in<br>Stimulant<br>score on<br>BAES |
|-----------------------------------------------------------|--------------------------|-------------------------------------------------|-----------------------------------------------------|------------------------------------------------|--------------------------------------------------------------------|-------------------------------------------------------------|-----------------------------------------------------------|----------------------------------------------|------------------------------|--------------------------------------------------------|-------------------------------------------|--------------------------------------------|
| Change in<br>latency of<br>motor<br>response<br>(ALCOHOL) | Pearson's<br>correlation | -.245                                           | -.297                                               | -.119                                          | .212                                                               | <b>.859</b>                                                 | 1                                                         | .117                                         | -.172                        | -.286                                                  | -.414                                     | .149                                       |
|                                                           | Significance<br>(p)      | .467                                            | .375                                                | .698                                           | .449                                                               | <b>&lt;.000**</b>                                           |                                                           | .691                                         | .541                         | .368                                                   | .125                                      | .644                                       |
|                                                           | N                        | 11                                              | 11                                                  | 13                                             | 15                                                                 | <b>15</b>                                                   | 15                                                        | 14                                           | 15                           | 12                                                     | 15                                        | 12                                         |
| Change in<br>velocity of<br>SEM<br>(ALCOHOL)              | Pearson's<br>correlation | .109                                            | -.022                                               | -.092                                          | .192                                                               | <b>-.547</b>                                                | .117                                                      | 1                                            | -.075                        | -.258                                                  | .137                                      | -.302                                      |
|                                                           | Significance<br>(p)      | .737                                            | .945                                                | .765                                           | .493                                                               | <b>.043*</b>                                                | .691                                                      |                                              | .791                         | .418                                                   | .628                                      | .34                                        |
|                                                           | N                        | 12                                              | 12                                                  | 13                                             | 15                                                                 | <b>14</b>                                                   | 14                                                        | 15                                           | 15                           | 12                                                     | 15                                        | 12                                         |
| Breath<br>Alcohol<br>Content                              | Pearson's<br>correlation | -.42                                            | <b>-.605</b>                                        | -.335                                          | -.131                                                              | -.265                                                       | -.172                                                     | -.075                                        | 1                            | .151                                                   | <b>.646</b>                               | .127                                       |
|                                                           | Significance<br>(p)      | .174                                            | <b>.037*</b>                                        | .242                                           | .629                                                               | .34                                                         | .541                                                      | .791                                         |                              | .623                                                   | <b>.007**</b>                             | .678                                       |
|                                                           | N                        | 12                                              | <b>12</b>                                           | 14                                             | 16                                                                 | 15                                                          | 15                                                        | 15                                           | 16                           | 13                                                     | <b>16</b>                                 | 13                                         |
| Change in<br>Subjective<br>High<br>Assessment<br>Scale    | Pearson's<br>correlation | .144                                            | -.026                                               | -.532                                          | -.456                                                              | -.276                                                       | -.286                                                     | -.258                                        | .151                         | 1                                                      | .439                                      | <b>.605</b>                                |
|                                                           | Significance<br>(p)      | .711                                            | .947                                                | .092                                           | .117                                                               | .385                                                        | .368                                                      | .418                                         | .623                         |                                                        | .133                                      | <b>.028*</b>                               |
|                                                           | N                        | 9                                               | 9                                                   | 11                                             | 13                                                                 | 12                                                          | 12                                                        | 12                                           | 13                           | 13                                                     | 13                                        | <b>13</b>                                  |
| Change in<br>sedative score<br>on BAES                    | Pearson's<br>correlation | -.47                                            | -.473                                               | -.417                                          | -.356                                                              | <b>-.583</b>                                                | -.414                                                     | .137                                         | <b>.646</b>                  | .439                                                   | 1                                         | .085                                       |
|                                                           | Significance<br>(p)      | .123                                            | .12                                                 | .138                                           | .175                                                               | <b>.022*</b>                                                | .125                                                      | .628                                         | <b>.007**</b>                | .133                                                   |                                           | .782                                       |
|                                                           | N                        | 12                                              | 12                                                  | 14                                             | 16                                                                 | <b>15</b>                                                   | 15                                                        | 15                                           | <b>16</b>                    | 13                                                     | 16                                        | 13                                         |
| Change in<br>stimulant<br>score on<br>BAES                | Pearson's<br>correlation | .315                                            | -.123                                               | -.12                                           | -.437                                                              | .134                                                        | .149                                                      | -.302                                        | .127                         | <b>.605</b>                                            | .085                                      | 1                                          |
|                                                           | Significance<br>(p)      | .409                                            | .752                                                | .724                                           | .135                                                               | .678                                                        | .644                                                      | .34                                          | .678                         | <b>.028*</b>                                           | .782                                      |                                            |
|                                                           | N                        | 9                                               | 9                                                   | 11                                             | 13                                                                 | 12                                                          | 12                                                        | 12                                           | 13                           | <b>13</b>                                              | 13                                        | 13                                         |
